# Supplementary material
Source: publisher site journal article supplement (https://www.dovepress.com/article/335400)
Supplement: Supplementary file 1 [file get_supplementary_file.php]

**Table S1.** The comparison of baseline characteristics of the training set and the validation set

| <b>Parameter</b>                      | <b>Training Set</b> | <b>Validation Set</b> | <b>P-value</b> |
|---------------------------------------|---------------------|-----------------------|----------------|
| Number of Patients                    | 3 966               | 1 700                 | -              |
| Age, yr, median (IQR)                 | 47.00 (16.00)       | 47.00 (16.00)         | 0.309          |
| Male Sex, n (%)                       | 3 150 (79.43)       | 1 366 (80.35)         | 0.426          |
| Nucleoside Analog Therapy, n (%)      | 928 (23.40)         | 388 (22.82)           | 0.638          |
| HBV-related HCC, n (%)                | 1 712 (43.17)       | 733 (43.12)           | 0.973          |
| AFP, ng/mL, median (IQR)              | 28.69 (227.45)      | 25.11 (205.36)        | 0.131          |
| PIVKA-II, mAU/mL, median (IQR)        | 48.00 (250.75)      | 47.00 (209.75)        | 0.622          |
| ALT, IU/L, median (IQR)               | 51.00 (126.00)      | 51.50 (132.00)        | 0.891          |
| AST, IU/L, median (IQR)               | 59.00 (106.25)      | 58.00 (114.00)        | 0.655          |
| INR, median (IQR)                     | 1.14 (0.34)         | 1.14 (0.32)           | 0.791          |
| ALB, g/L, median (IQR)                | 37.80 (11.50)       | 37.90 (11.30)         | 0.891          |
| GGT, IU/L, median (IQR)               | 71.00 (106.00)      | 71.00 (110.75)        | 0.960          |
| ALP, IU/L, median (IQR)               | 109.00 (67.00)      | 111.00 (64.00)        | 0.261          |
| PLT, 10 <sup>9</sup> /L, median (IQR) | 114.00 (96.25)      | 109.00 (90.00)        | 0.027          |
| TBIL, μmol/L, median (IQR)            | 21.90 (78.73)       | 21.80 (72.50)         | 0.830          |

|                        |                      |                      |       |
|------------------------|----------------------|----------------------|-------|
| HBV-DNA, IU/mL, median | $5.61 \times 10^3$   | $4.87 \times 10^3$   |       |
| (IQR)                  | $(1.98 \times 10^5)$ | $(2.16 \times 10^5)$ | 0.434 |

---

Abbreviations: AFP, alpha-fetoprotein; PIVKA-II, protein induced by vitamin K absence or antagonist-II; ALT, alanine aminotransferase; AST, aspartate aminotransferase; INR, international normalized ratio; ALB, albumin; GGT, gamma-glutamyl transferase; ALP, alkaline phosphatase; PLT, platelet; TBIL, total bilirubin; IQR, interquartile range.

**Table S2.** The comparison of baseline characteristics of NA-treated patients and untreated patients in the training set

| <b>Parameter</b>                      | <b>NA-treated patients</b>                      | <b>Untreated patients</b>                       | <b>P-value</b> |
|---------------------------------------|-------------------------------------------------|-------------------------------------------------|----------------|
| <b>CHB</b>                            |                                                 |                                                 |                |
| Number of Patients                    | 306                                             | 713                                             | -              |
| Age, yr, median (IQR)                 | 41.00 (18.25)                                   | 39.00 (19.00)                                   | 0.194          |
| Male Sex, n (%)                       | 203 (66.34)                                     | 505 (70.83)                                     | 0.154          |
| ALT, IU/L, median (IQR)               | 117.50 (423.75)                                 | 193.00 (459.50)                                 | 0.010          |
| AST, IU/L, median (IQR)               | 80.00 (202.00)                                  | 121.00 (272.00)                                 | 0.006          |
| INR, median (IQR)                     | 1.10 (0.26)                                     | 1.11 (0.28)                                     | 0.353          |
| ALB, g/L, median (IQR)                | 38.65 (9.75)                                    | 38.10 (9.15)                                    | 0.844          |
| GGT, IU/L, median (IQR)               | 72.00 (128.50)                                  | 89.00 (132.50)                                  | 0.032          |
| ALP, IU/L, median (IQR)               | 105.50 (76.50)                                  | 111.00 (68.00)                                  | 0.126          |
| PLT, 10 <sup>9</sup> /L, median (IQR) | 146.50 (90.75)                                  | 155.00 (88.00)                                  | 0.191          |
| TBIL, μmol/L, median (IQR)            | 25.05 (160.05)                                  | 38.90 (176.10)                                  | 0.022          |
| HBV-DNA, IU/mL, median (IQR)          | 2.14*10 <sup>3</sup><br>(9.38*10 <sup>4</sup> ) | 2.25*10 <sup>4</sup><br>(1.36*10 <sup>6</sup> ) | 0.009          |
| <b>HBV-related Cirrhosis</b>          |                                                 |                                                 |                |
| Number of Patients                    | 358                                             | 877                                             | -              |
| Age, yr, median (IQR)                 | 47.00 (15.25)                                   | 47.00 (14.00)                                   | 0.711          |

|                                       |                                                 |                                                 |        |
|---------------------------------------|-------------------------------------------------|-------------------------------------------------|--------|
| Male Sex, n (%)                       | 285 (79.61)                                     | 702 (80.05)                                     | 0.862  |
| ALT, IU/L, median (IQR)               | 56.00 (130.50)                                  | 70.00 (206.00)                                  | 0.012  |
| AST, IU/L, median (IQR)               | 77.00 (109.00)                                  | 96.00 (167.00)                                  | <0.001 |
| INR, median (IQR)                     | 1.3750 (0.54)                                   | 1.46 (0.62)                                     | 0.019  |
| ALB, g/L, median (IQR)                | 30.65 (13.52)                                   | 30.05 (12.95)                                   | 0.529  |
| GGT, IU/L, median (IQR)               | 63.50 (82.00)                                   | 65.00 (84.00)                                   | 0.613  |
| ALP, IU/L, median (IQR)               | 120.50 (72.25)                                  | 128.00 (68.50)                                  | 0.054  |
| PLT, 10 <sup>9</sup> /L, median (IQR) | 70.50 (69.00)                                   | 76.00 (71.00)                                   | 0.161  |
| TBIL, µmol/L, median (IQR)            | 48.60 (180.35)                                  | 85.90 (249.90)                                  | 0.002  |
| HBV-DNA, IU/mL, median (IQR)          | 7.92*10 <sup>3</sup><br>(6.94*10 <sup>4</sup> ) | 8.06*10 <sup>3</sup><br>(3.64*10 <sup>5</sup> ) | 0.936  |

#### HBV-related HCC

|                         |                |                |        |
|-------------------------|----------------|----------------|--------|
| Number of Patients      | 264            | 1 448          | -      |
| Age, yr, median (IQR)   | 50.00 (15.00)  | 51.00 (16.00)  | 0.246  |
| Male Sex, n (%)         | 227 (85.98)    | 1 228 (84.81)  | 0.622  |
| ALT, IU/L, median (IQR) | 42.50 (39.00)  | 38.00 (34.00)  | 0.004  |
| AST, IU/L, median (IQR) | 46.50 (44.00)  | 41.00 (36.75)  | 0.027  |
| INR, median (IQR)       | 1.09 (0.17)    | 1.08 (0.14)    | 0.093  |
| ALB, g/L, median (IQR)  | 39.95 (8.75)   | 41.35 (6.98)   | <0.001 |
| GGT, IU/L, median (IQR) | 78.50 (109.75) | 67.00 (106.75) | 0.423  |
| ALP, IU/L, median (IQR) | 102.00 (58.75) | 97.00 (57.00)  | 0.206  |

|                                       |                                                 |                                                 |        |
|---------------------------------------|-------------------------------------------------|-------------------------------------------------|--------|
| PLT, 10 <sup>9</sup> /L, median (IQR) | 109.00 (89.75)                                  | 122.00 (97.00)                                  | 0.008  |
| TBIL, μmol/L, median (IQR)            | 17.80 (14.18)                                   | 14.80 (9.98)                                    | <0.001 |
| HBV-DNA, IU/mL, median (IQR)          | 9.56*10 <sup>2</sup><br>(2.54*10 <sup>4</sup> ) | 2.03*10 <sup>3</sup><br>(7.39*10 <sup>4</sup> ) | 0.259  |
| Maximum Tumor Diameter ≥3cm,<br>n (%) | 150 (56.82)                                     | 844 (58.29)                                     | 0.656  |
| BCLC Staging: 0/A, n (%)              | 171 (64.77)                                     | 873 (60.29)                                     | 0.170  |

---

Abbreviations: CHB, chronic hepatitis B; HCC, hepatocellular carcinoma; HBV, Hepatitis B virus; NA, nucleoside analog; ALT, alanine aminotransferase; AST, aspartate aminotransferase; INR, international normalized ratio; ALB, albumin; GGT, gamma-glutamyl transferase; ALP, alkaline phosphatase; PLT, platelet; TBIL, total bilirubin; IQR, interquartile range; BCLC, Barcelona Clinic Liver Cancer stage.

**Table S3.** The comparison of baseline characteristics of NA-treated patients in the training set and in the validation set

| <b>Parameter</b>                      | <b>Training Set</b>                             | <b>Validation Set</b>                           | <b>P-value</b> |
|---------------------------------------|-------------------------------------------------|-------------------------------------------------|----------------|
| Number of Patients                    | 928                                             | 388                                             | -              |
| Age, yr, median (IQR)                 | 46.00 (16.00)                                   | 45.00 (17.25)                                   | 0.918          |
| Male Sex, n (%)                       | 715 (77.05)                                     | 304 (78.35)                                     | 0.604          |
| HBV-related HCC, n (%)                | 264 (28.45)                                     | 107 (27.58)                                     | 0.748          |
| AFP, ng/mL, median (IQR)              | 14.79 (81.44)                                   | 13.64 (72.19)                                   | 0.504          |
| PIVKA-II, mAU/mL, median (IQR)        | 34.00 (51.00)                                   | 35.00 (38.25)                                   | 0.930          |
| ALT, IU/L, median (IQR)               | 56.00 (137.50)                                  | 55.50 (174.75)                                  | 0.290          |
| AST, IU/L, median (IQR)               | 62.00 (109.25)                                  | 60.00 (121.75)                                  | 0.197          |
| INR, median (IQR)                     | 1.18 (0.36)                                     | 1.18 (0.37)                                     | 0.166          |
| ALB, g/L, median (IQR)                | 36.40 (12.33)                                   | 35.95 (11.65)                                   | 0.689          |
| GGT, IU/L, median (IQR)               | 70.00 (104.00)                                  | 66.00 (99.25)                                   | 0.126          |
| ALP, IU/L, median (IQR)               | 110.00 (72.25)                                  | 112.00 (65.00)                                  | 0.788          |
| PLT, 10 <sup>9</sup> /L, median (IQR) | 105.00 (96.00)                                  | 93.50 (90.00)                                   | 0.005          |
| TBIL, μmol/L, median (IQR)            | 25.00 (106.30)                                  | 27.70 (104.18)                                  | 0.957          |
| HBV-DNA, IU/mL, median (IQR)          | 5.93*10 <sup>2</sup><br>(4.64*10 <sup>4</sup> ) | 5.49*10 <sup>2</sup><br>(1.49*10 <sup>4</sup> ) | 0.552          |

Abbreviations: HCC, hepatocellular carcinoma; HBV, Hepatitis B virus; AFP, alpha-fetoprotein; PIVKA-II, protein induced by vitamin K absence or antagonist-II; ALT, alanine aminotransferase; AST, aspartate aminotransferase; INR, international normalized ratio; ALB, albumin; GGT, gamma-glutamyl transferase; ALP, alkaline phosphatase; PLT, platelet; TBIL, total bilirubin; IQR, interquartile range.

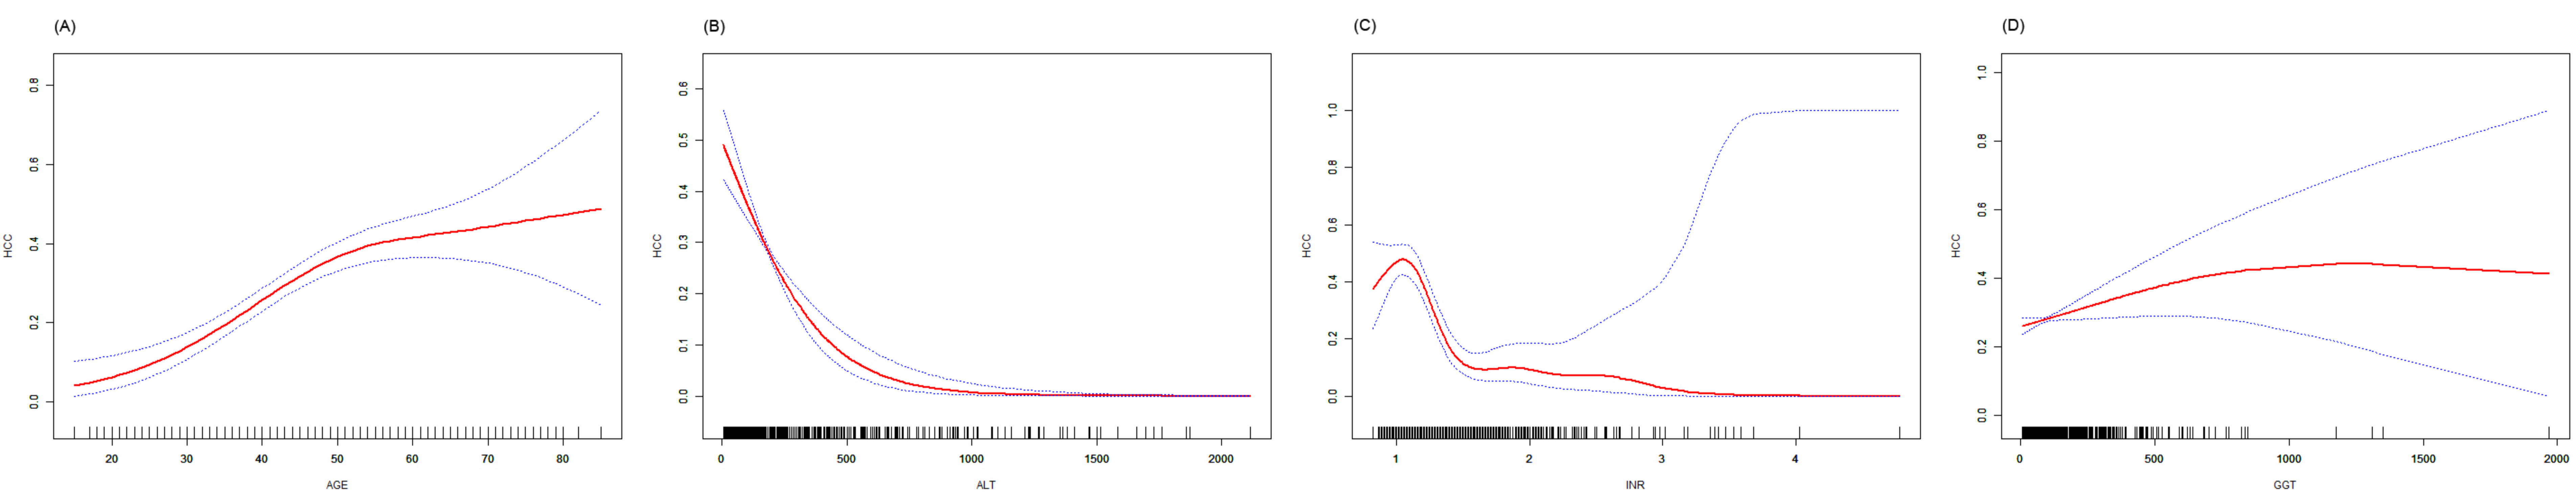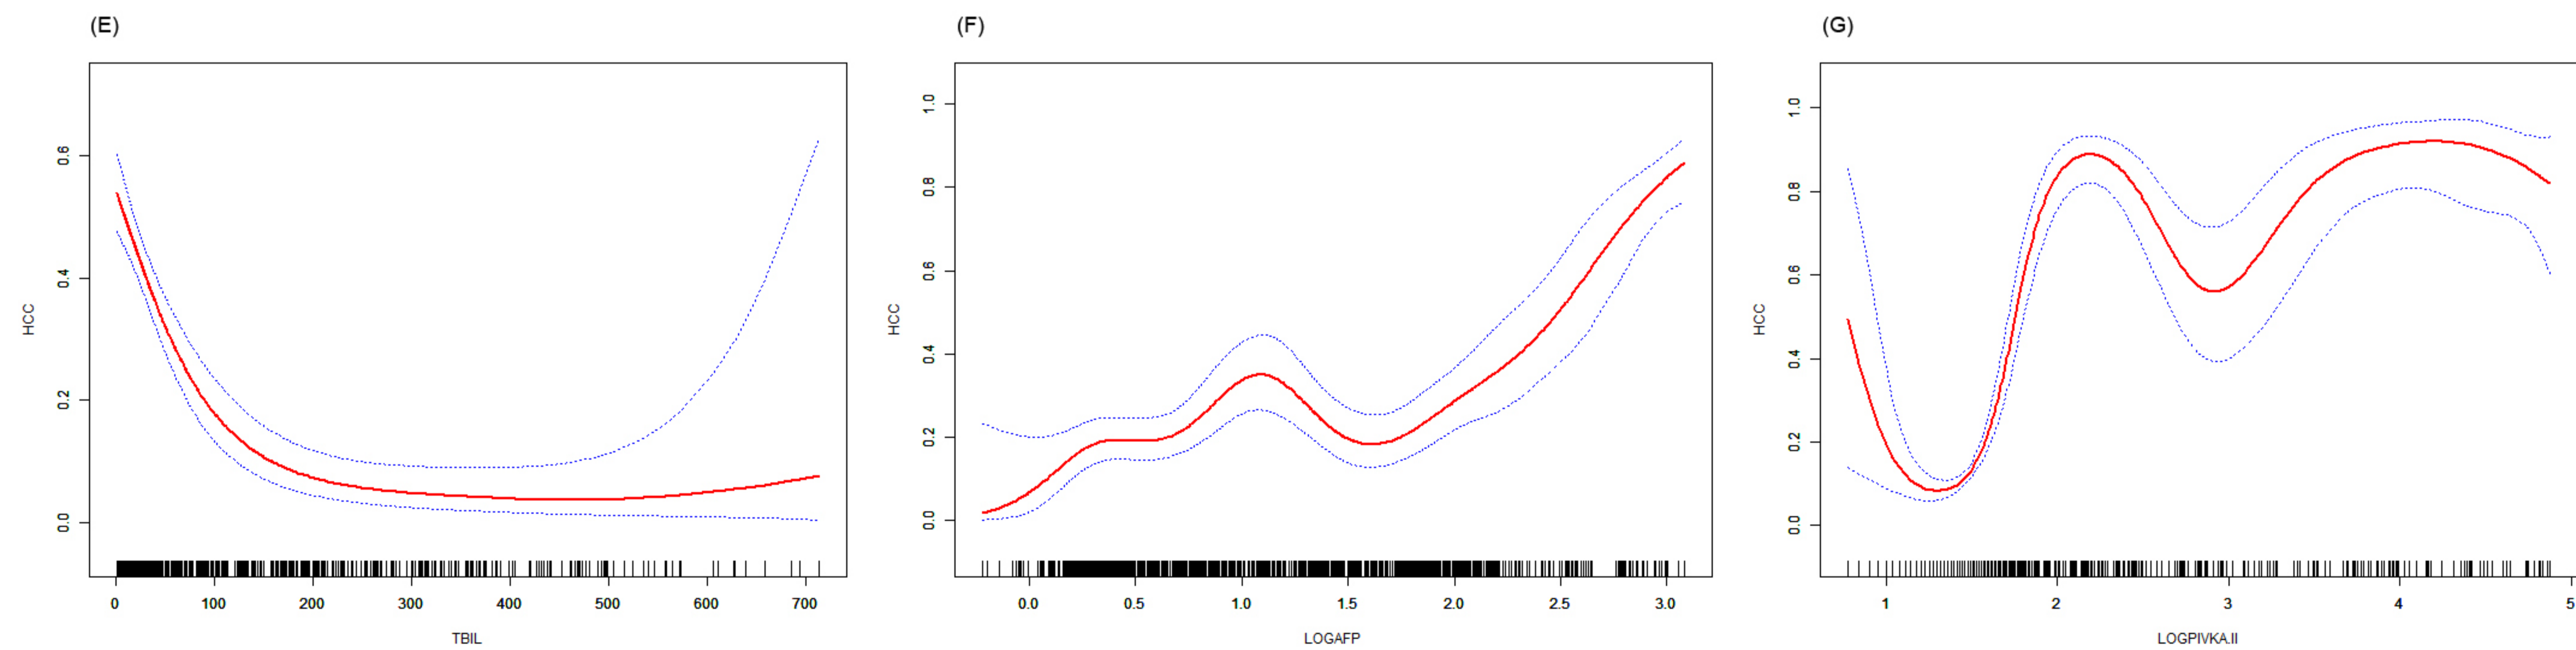



## **Supplementary Figure Caption**

**Figure S1. Calibration curves for independent predictors of HBV-related HCC in NA-treated patients of the training set.**

A: Age calibration curve. B: ALT calibration curve. C: INR calibration curve. D: GGT calibration curve. E: TBIL calibration curve. F: LogAFP calibration curve. G: LogPIVKA-II calibration curve.
